# Supplementary material for: Exploring Key Genes to Construct a Diagnosis Model of Dilated Cardiomyopathy
Source: PubMed Central journal article supplement (PMC9091505; doi:10.3389/fcvm.2022.865096), 2022-04-27
Supplement: Image_1.pdf [file Image_1.pdf]

## Supplemental Figure

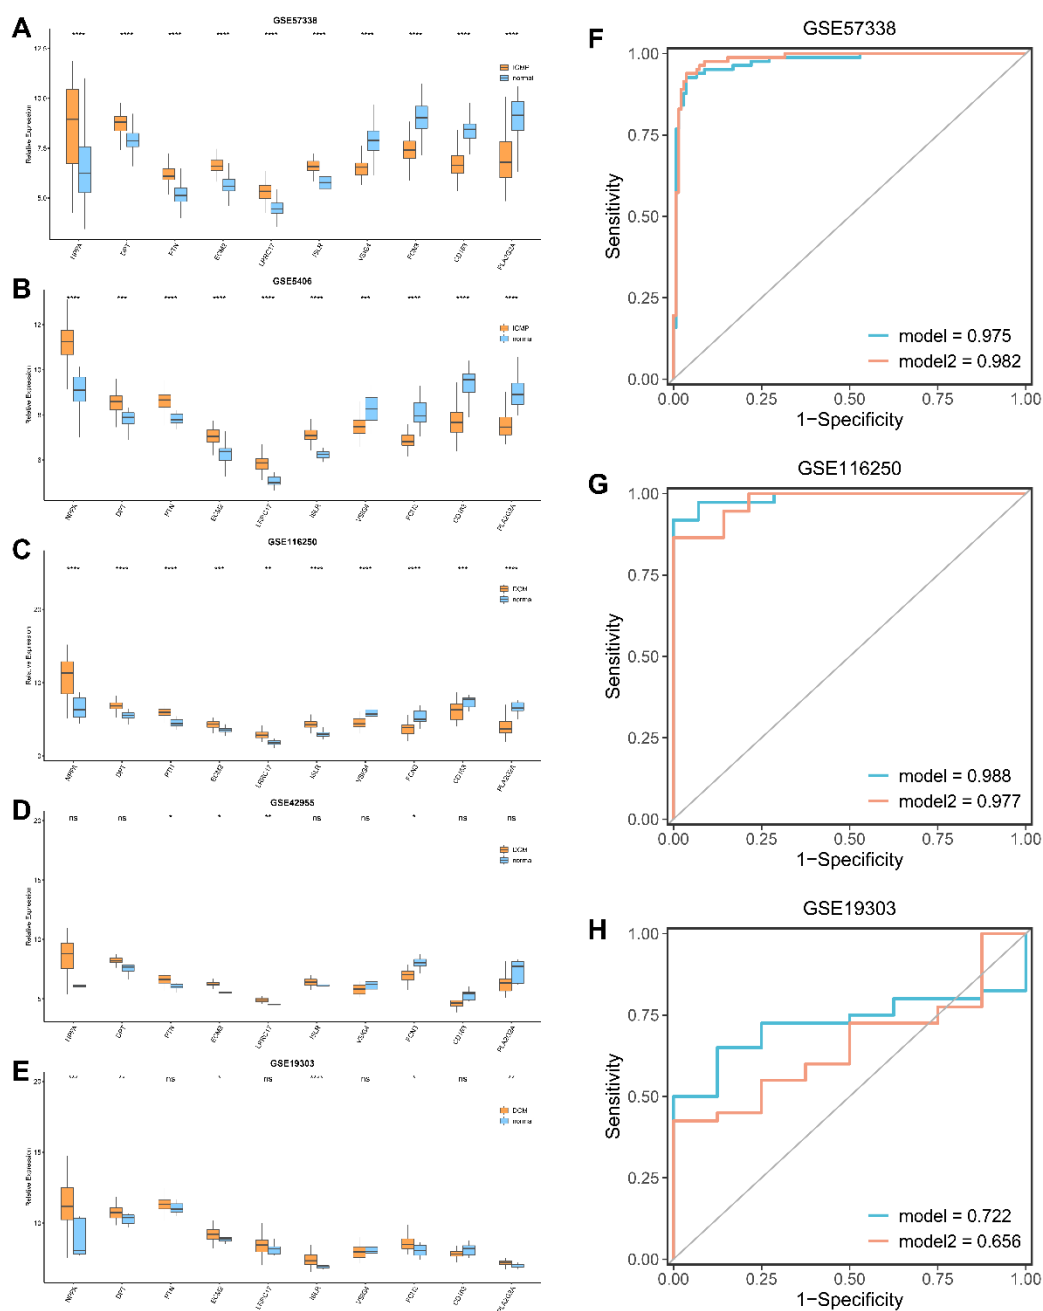

**Figure S1. The validation of genes expression; The comparison with the other model. (A-E)** Boxplots of model genes' expression level in five datasets. **(F-H)** The ROC curves of our model and the other model (model 2) in three datasets.
